# Supplementary material for: Increasing Fuel Loads, Fire Hazard, and Carbon Emissions from Fires in Central Siberia
Source: MDPI journal article supplement (doi:10.3390/fire6020063), 2023-02-09
Supplement: s1 [file s1]

Archive with 1 entries (1 files):
- fire-2160276-supplementary.pdf
